# Supplementary material
Source: publisher figshare collection journal article supplement (https://gsapubs.figshare.com/ndownloader/files/22398378)
Supplement: Supplementary file 1 [file 22398378]

Table A2 40Ar/39Ar and K-Ar data from biotite, muscovite and hornblende

| Sample # and  rock type | Lat. (°N)  Lon. (°W) | Elev.  (m) | 40Ar/39Ar integrated or K-Ar Age (Ma) ± 1σ | 40Ar/39Ar plateau Age (Ma) ± 1σ | Plateau information  (or K-Ar reference) |
| --- | --- | --- | --- | --- | --- |
| **Biotite North of Denali Fault** | | | | | |
| 01PAN  granite | 63.4670  148.7350 | 1011 | 36.6 ± 0.2 | 36.9 ± 0.2 | 9 steps  MSWD = 1.29 |
| AST332  granite | 63.4810  148.4880 | 1324 | 37.9 ± 1.1 (K-Ar) | - | Csejtey, 1992 |
| 04NEN  granite | 63.5160  147.8477 | 1859 | 37.3 ± 0.1 | 38.3 ± 0.2 | 5 steps  MSWD = 2.11 |
| DT45  granodiorite | 63.5800  147.6460 | 1920 | 37.9 ±1.1 (K-Ar) | - | Csejtey et al., 1992 |
| 37NEN  granodiorite | 63.5440  147.6970 | 2347 | 35.6 ± 0.1 | 36.2 ± 0.1 | 3 steps  MSWD = 0.31 |
| 32NEN  granodiorite | 63.5130  147.7270 | 1271 | 29.4 ± 2.2 | 30.2 ± 2.3 | 8 steps  MSWD = 0.52 |
| 02DEB  tonalite | 63.6126  147.2770 | 2268 | 65.6 ± 0.3 | 68.4 ± 0.3 | 4 steps  MSWD = 2.30 |
| 24DEB  tonalite | 63.5957  147.3449 | 2042 | 32.0 ± 0.1 | 32.5 ± 0.1 | 4 steps  MSWD = 1.65 |
| 07DEB  tonalite | 63.5699  147.2897 | 1524 | 27.4 ± 0.1 | 28.5 ± 0.2 | 7 steps  MSWD = 0.61 |
| 03BAL  granite | 63.6224  146.9251 | 2164 | 33.2 ± 0.2 | 33.3 ± 0.2 | 5 steps  MSWD = 0.62 |
| 18BAL  granite | 63.5808  146.9405 | 1750 | 22.8 ± 0.1 | 22.5 ± 0.1 | 3 steps  MSWD = 0.40 |
| 19BAL  granite | 63.5713  146.9481 | 1615 | 21.3 ± 0.1 | 21.3 ± 0.1 | 5 steps  MSWD = 2.80 |
| ANK28  metagranite | 63.5380  146.9710 | 1694 | 18.2 ± 0.6 (K-Ar) | - | Nokleberg et al., 1996 |
| 30RAP  granite | 63.5160  146.6847 | 1719 | 18.5 ± 0.1 | 18.4 ± 0.1 | 8 steps  MSWD = 1.29 |
| 03RAP  granite | 63.4827  146.0428 | 2041 | 32.1 ± 0.1 | 32.5 ± 0.1 | 8 steps  MSWD = 0.30 |
| **Biotite South of Denali Fault** | | | | | |
| 45RAP orthogneiss | 63.4723  146.4310 | 1635 | 31.9 ± 0.1 | 32.5 ± 0.1 | 6 steps  MSWD = 0.41 |
| 311AST  orthogneiss | 63.4881  146.8292 | 1905 | 34.6 ± 0.2 | 34.6 ± 0.2 | 6 steps  MSWD = 0.37 |
| 05RAP  orthogneiss | 63.4337  146.5411 | 2111 | 31.8 ± 0.1 | 31.9 ± 0.1 | 7 steps  MSWD = 0.50 |
| 09RAP  orthogneiss | 63.4345  146.5277 | 1918 | 31.2 ± 0.2 | 31.4 ± 0.2 | 7 steps  MSWD = 0.87 |
| **Muscovite South of Denali Fault** | | | | | |
| 45RAP  orthogneiss | 63.4723  146.4310 | 1635 | 31.5 ± 0.1 | 31.6 ± 0.1 | 6 steps  MSWD = 0.96 |
| 05RAP  orthogneiss | 63.4337  146.5411 | 2111 | 32.6 ± 0.3 | 32.6 ± 0.3 | 6 steps  MSWD = 0.29 |
| **Hornblende North of Denali Fault** | | | | | |
| DT45  granodiorite | 63.5800  147.6460 | 1920 | 39.6 ± 1.1 (K-Ar) | - | Csejtey, 1994 |
| **Hornblende South of Denali Fault** | | | | | |
| 311AST  orthogneiss | 63.4881  146.8292 | 1905 | 34.7 ± 0.8 | 35.4 ± 0.6 | 4 steps  MSWD = 0.65 |
